# Supplementary material for: Discovery of new solid phase sulfur oxidation catalysts using library screeningElectronic supplementary information (ESI) available: HPLC conditions. See http://www.rsc.org/suppdata/cc/b1/b108487a/
Source: Royal Society of Chemistry journal article supplement (doi:10.1039/b108487a), 2001-11-23
Supplement: b108487a.pdf [file b108487a.pdf]

# HPLC conditions

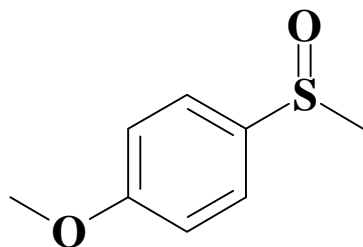

**AS column**  
**30% IPA in heptane**

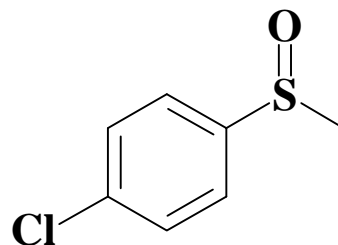

**OD column**  
**2% IPA in heptane**

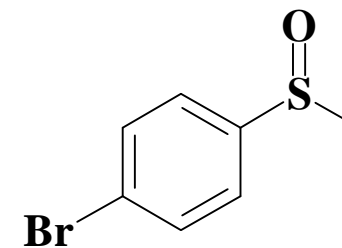

**OD column**  
**5% IPA in heptane**

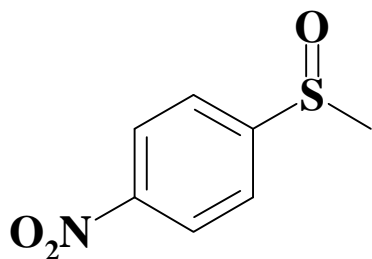

**AS column**  
**30% IPA in heptane**

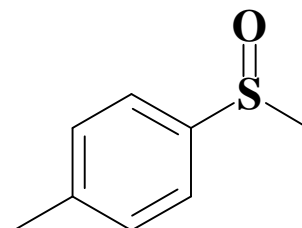

**OD column**  
**2% IPA in heptane**

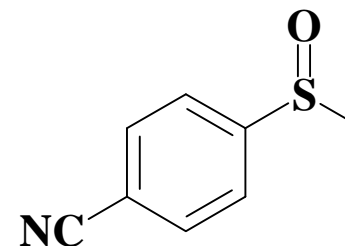

**AS column**  
**30% IPA in heptane**

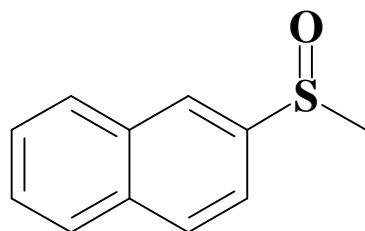

**OD column**  
**2% IPA in heptane**

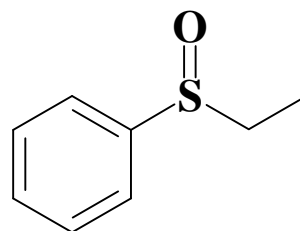

**OD column**  
**5% IPA in heptane**

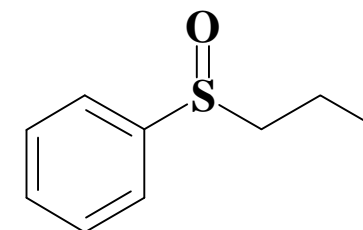

**OD column**  
**5% IPA in heptane**
